# Supplementary figures and images for: Long Non-Coding RNA PVT1 and Its Target miRNA-146a as Potential Prognostic Biomarkers in Rheumatoid Arthritis Patients
Source: MDPI journal article supplement (doi:10.3390/life11121382), 2021-12-10

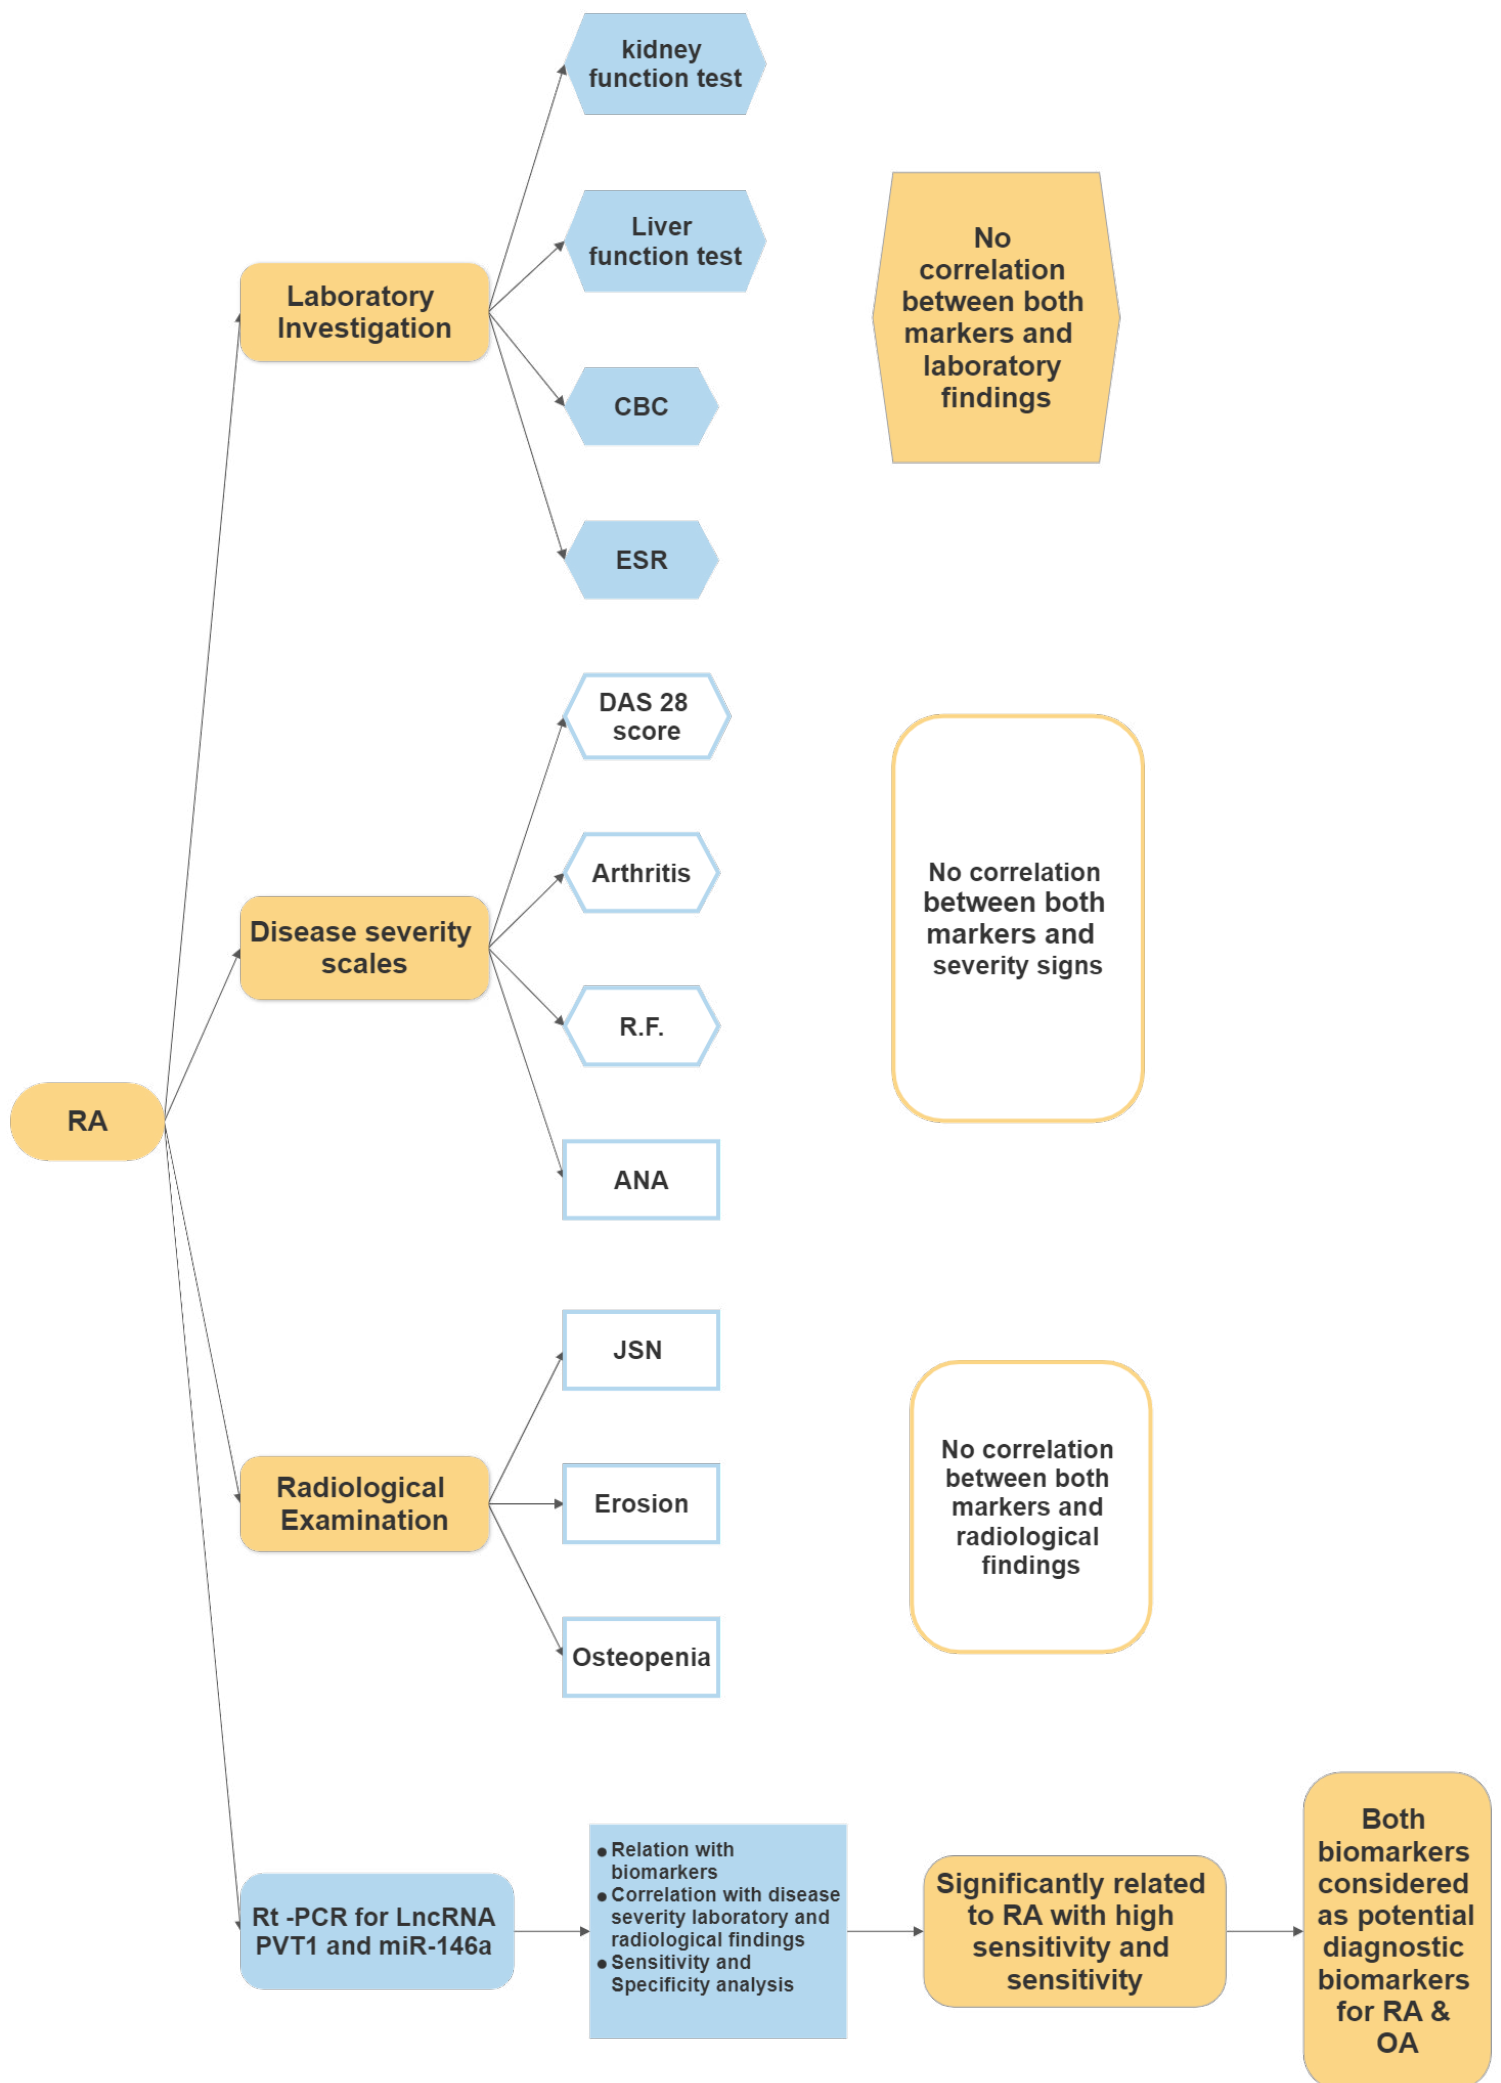

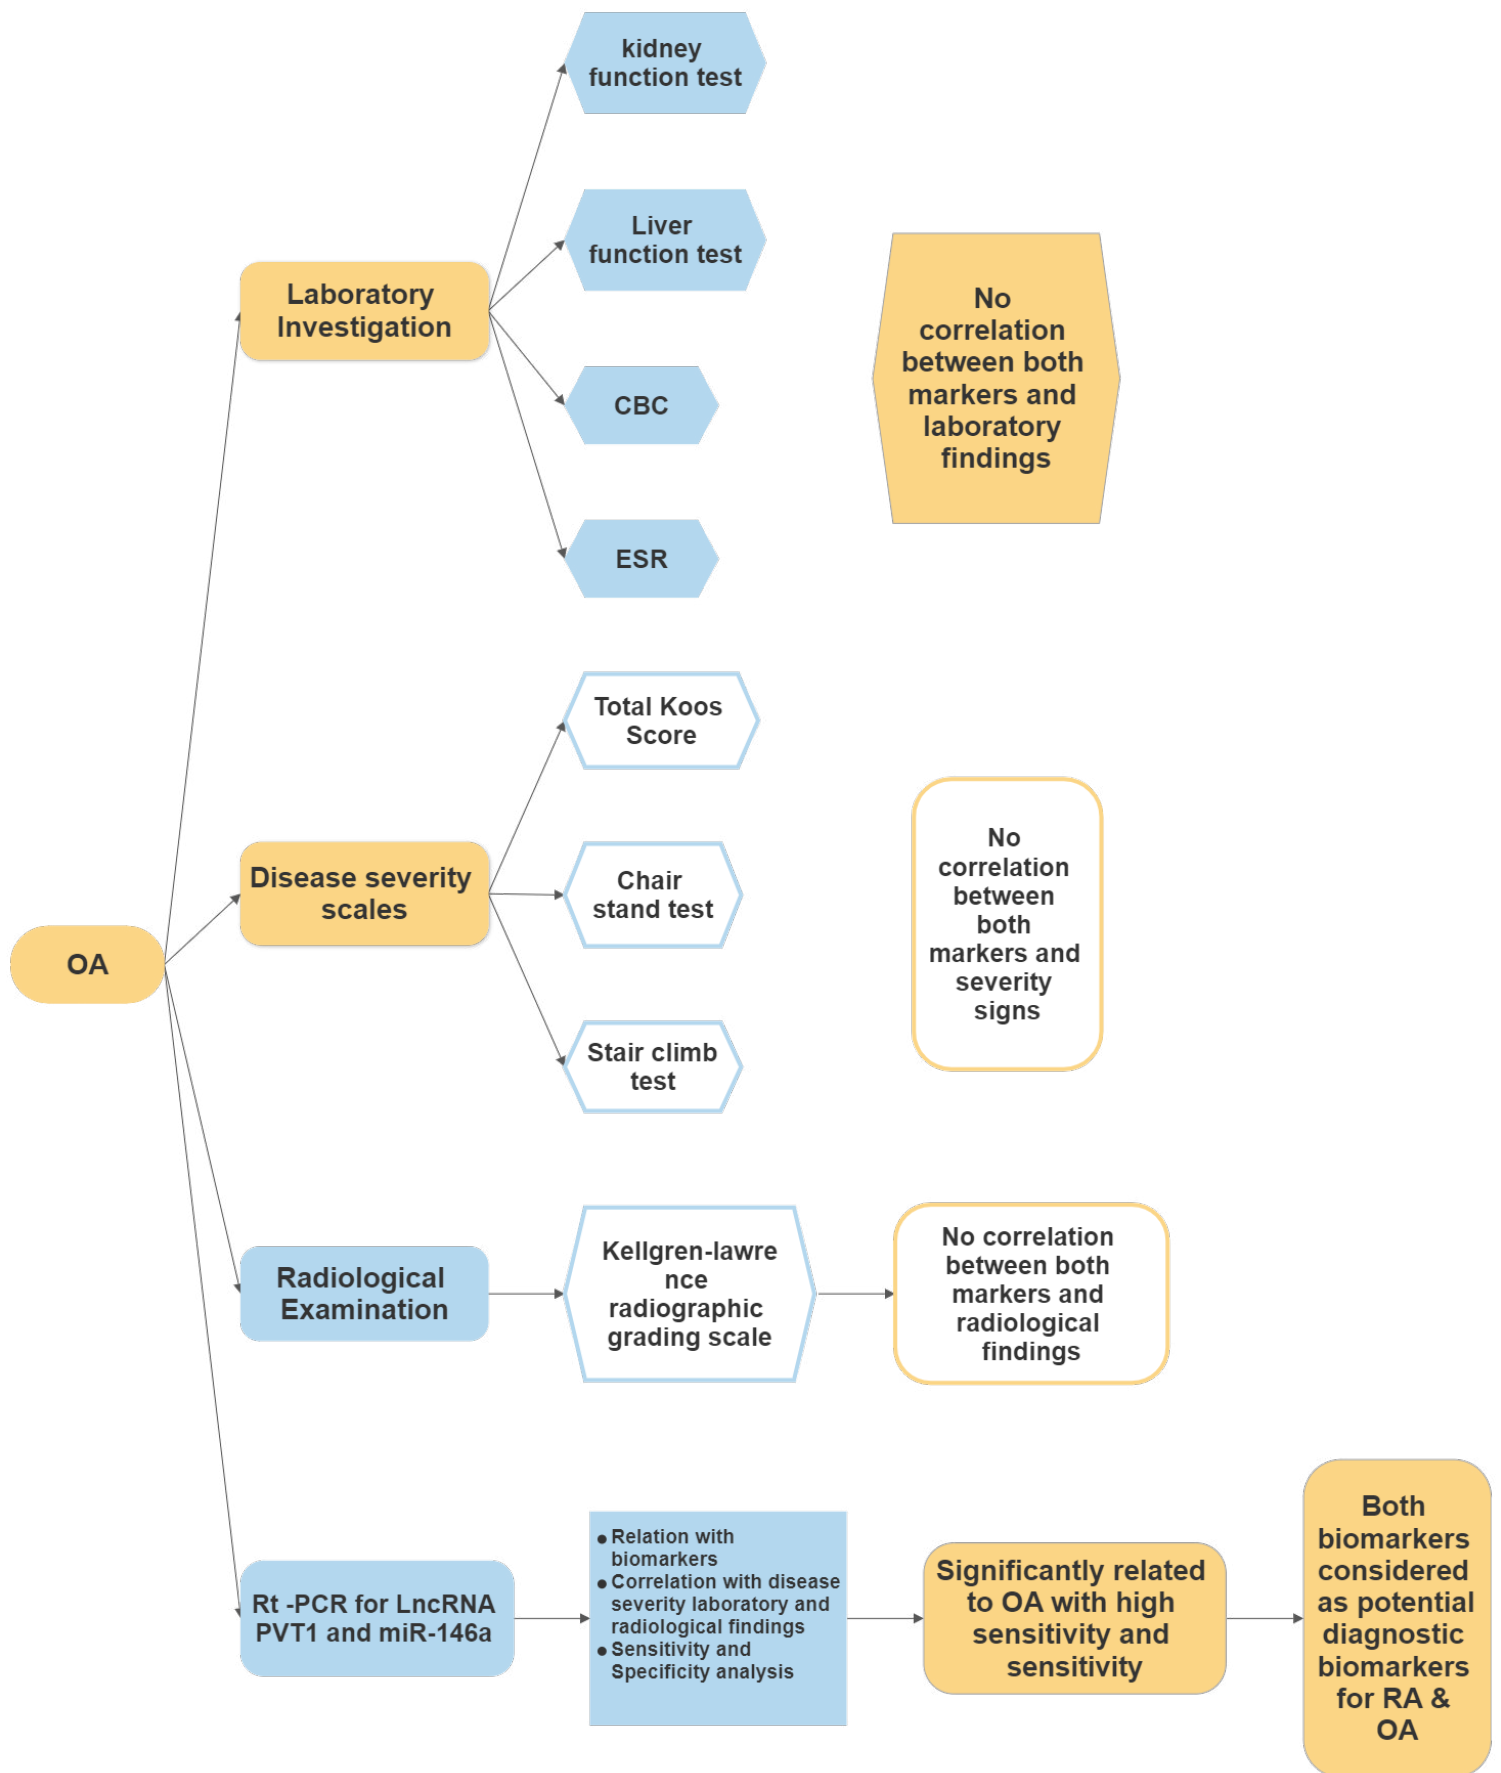

Supplement: s1 [file s1]
